# Supplementary material for: Novel Senolytic Ingredient, Camellia sinensis Root Extract, Ameliorates Skin Aging-Associated Phenotypes
Source: Research Square preprint supplement (doi:10.21203/rs.3.rs-7016169/v1), 2025-07-22
Supplement: Supplementary file 1 [file 3e179ebe1a93746e8763f46b.pdf]

# **Novel Senolytic Ingredient, [\*Camellia sinensis\*](#) Root Extract, Ameliorates Skin Aging-Associated Phenotypes**

Sunyoung Park<sup>†</sup>, Siyoung Cho<sup>†</sup>, Daejin Min, Hyunjung Choi, Kyeonghwan Hwang, In Sup Kil, Won-Seok Park, Hyoung-June Kim\*

Research and Innovation Center, Amorepacific, Yongin, Republic of Korea

\* Corresponding author: Hyoung-June Kim, Research and Innovation Center, Amorepacific, 1920 Yonggu-daero, Giheung-gu, Yongin-si, Gyeonggi-do, Republic of Korea

Fax : 82-31-899-2595

Tel : 82-31-899-5827

E-mail: [leojune@amorepacific.com](mailto:leojune@amorepacific.com)

<sup>†</sup>These authors contributed equally to this work.

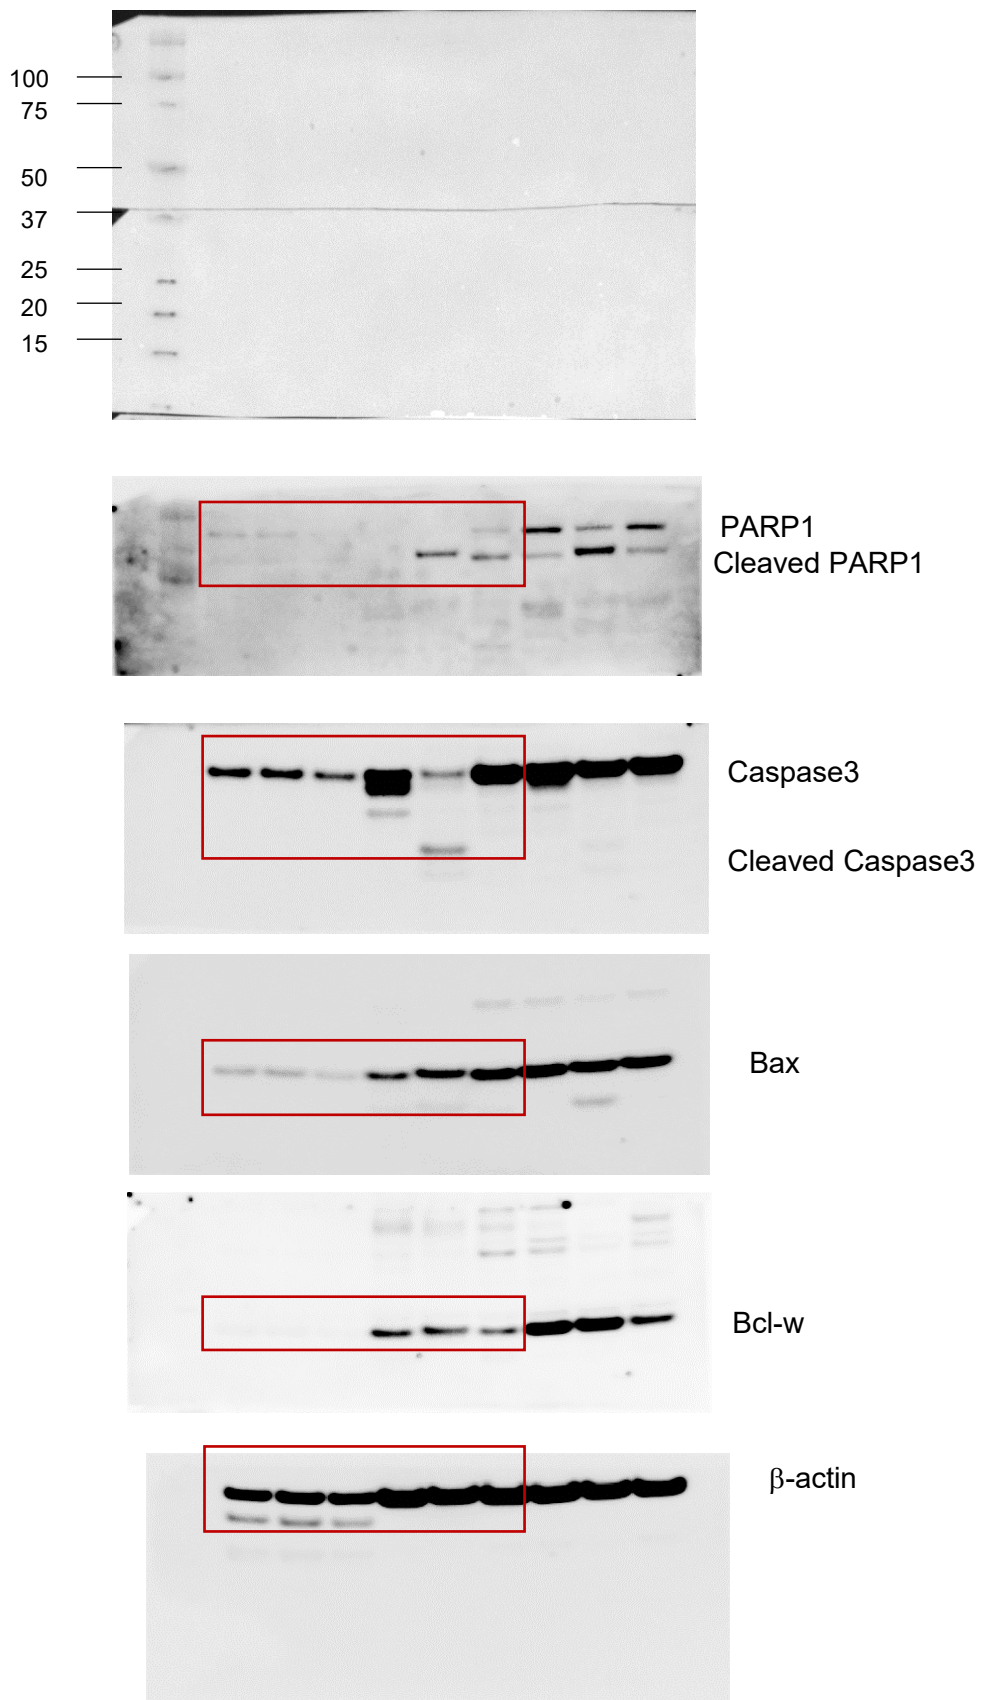

**Figure.S4** Full-length Western blot images corresponding to Figure 2C in the manuscript.

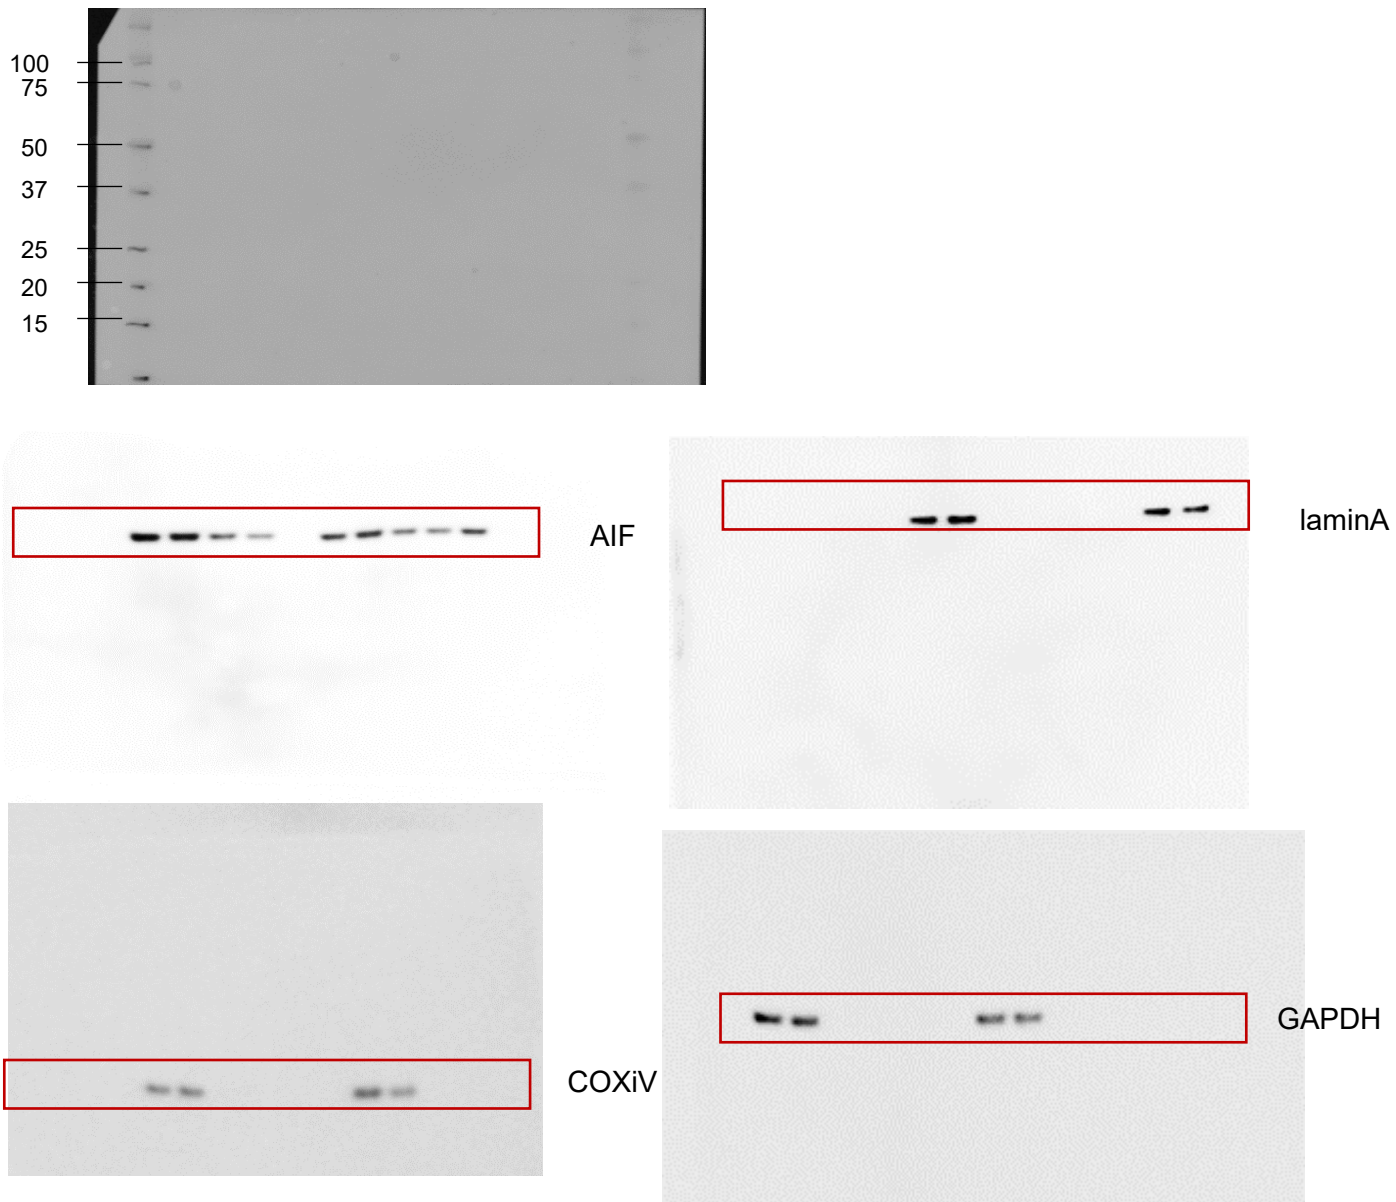

**Figure.S5** Full-length Western blot images corresponding to Figure 2D in the manuscript.

[Figure 3A]

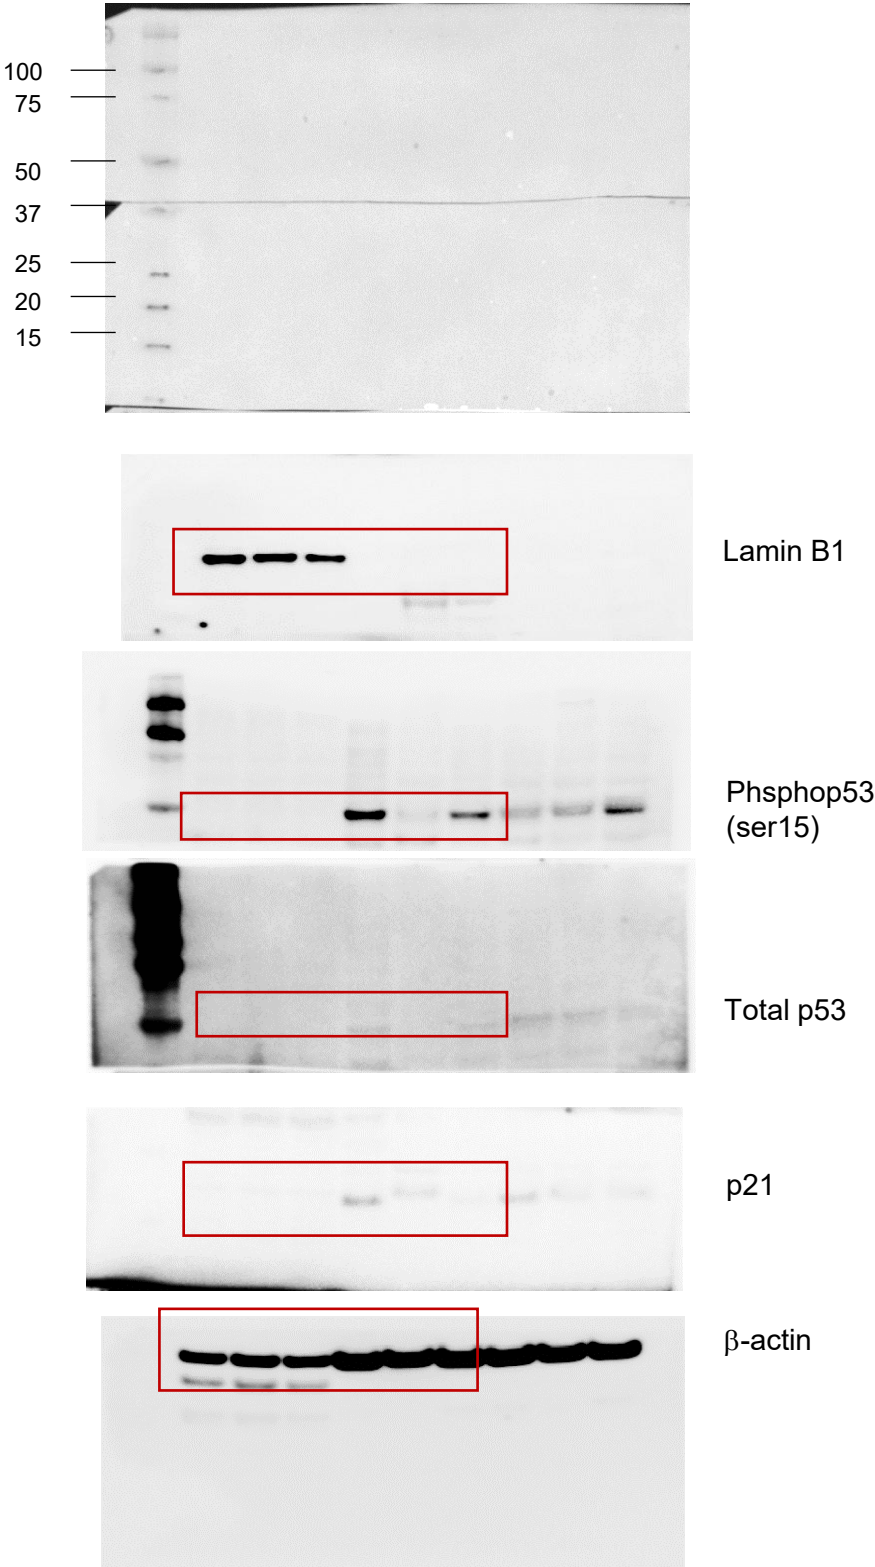

Figure.S6 Full-length Western blot images corresponding to Figure 3A in the manuscript.

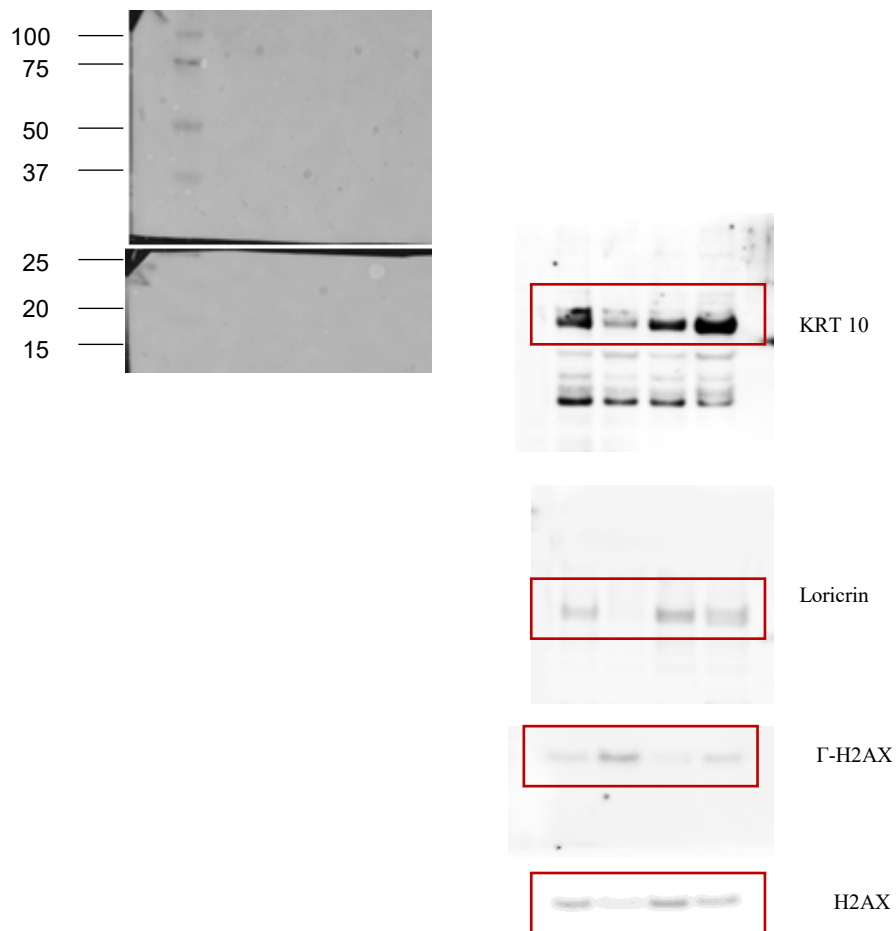

**Figure.S7** Full-length Western blot images corresponding to Figure 4A in the manuscript.

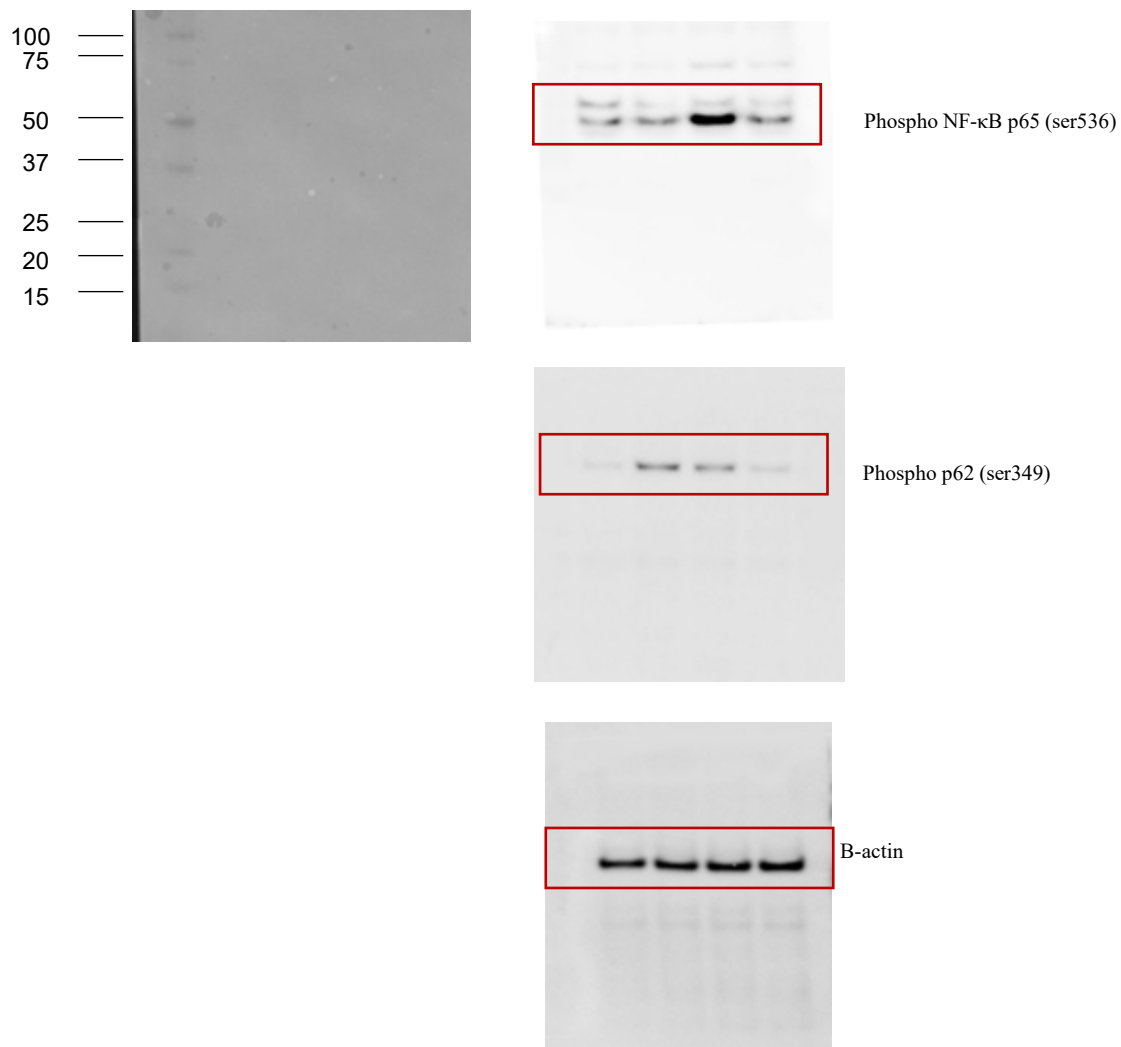

**Figure.S8** Full-length Western blot images corresponding to Figure 5C in the manuscript.

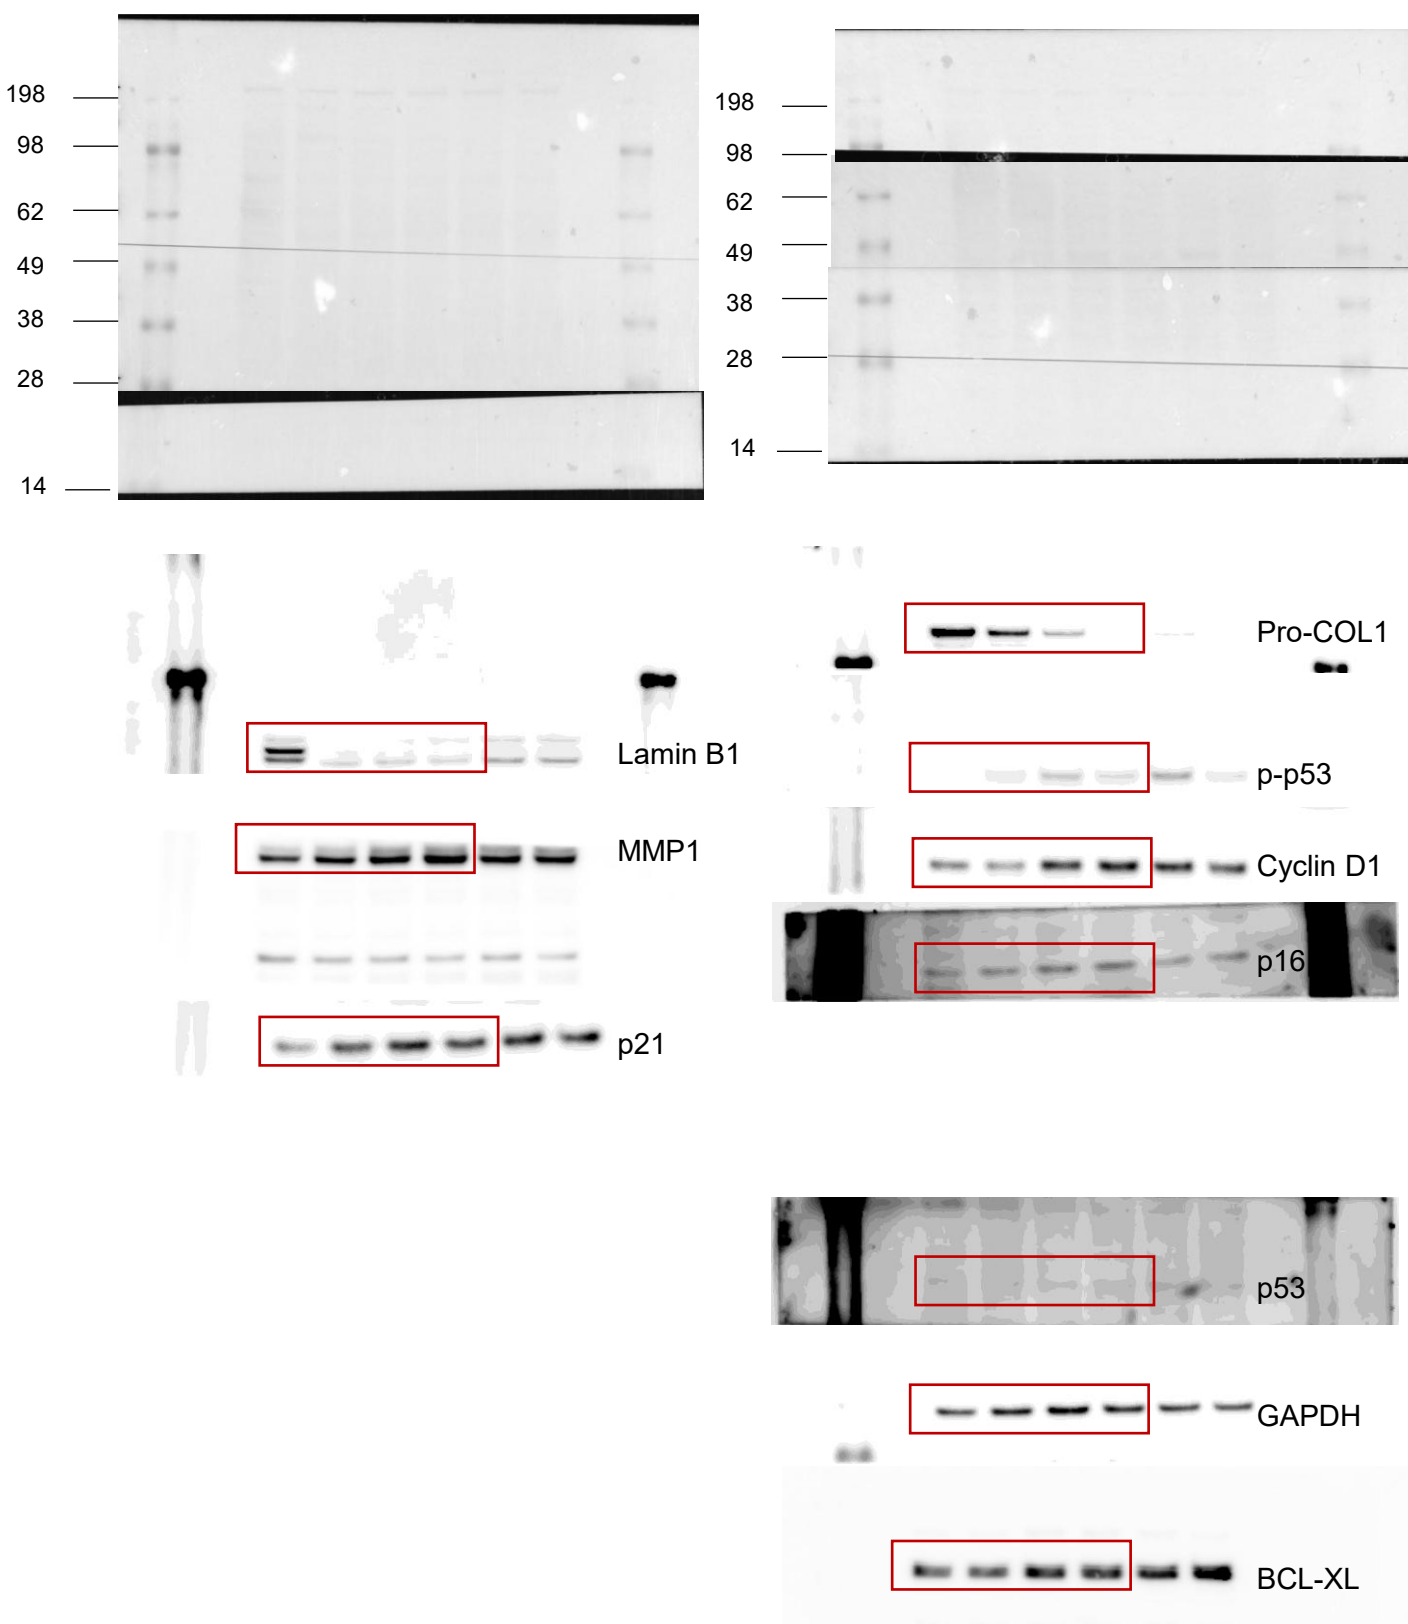

**Figure.S9** Full-length Western blot images corresponding to Supple Figure 1C in the manuscript.

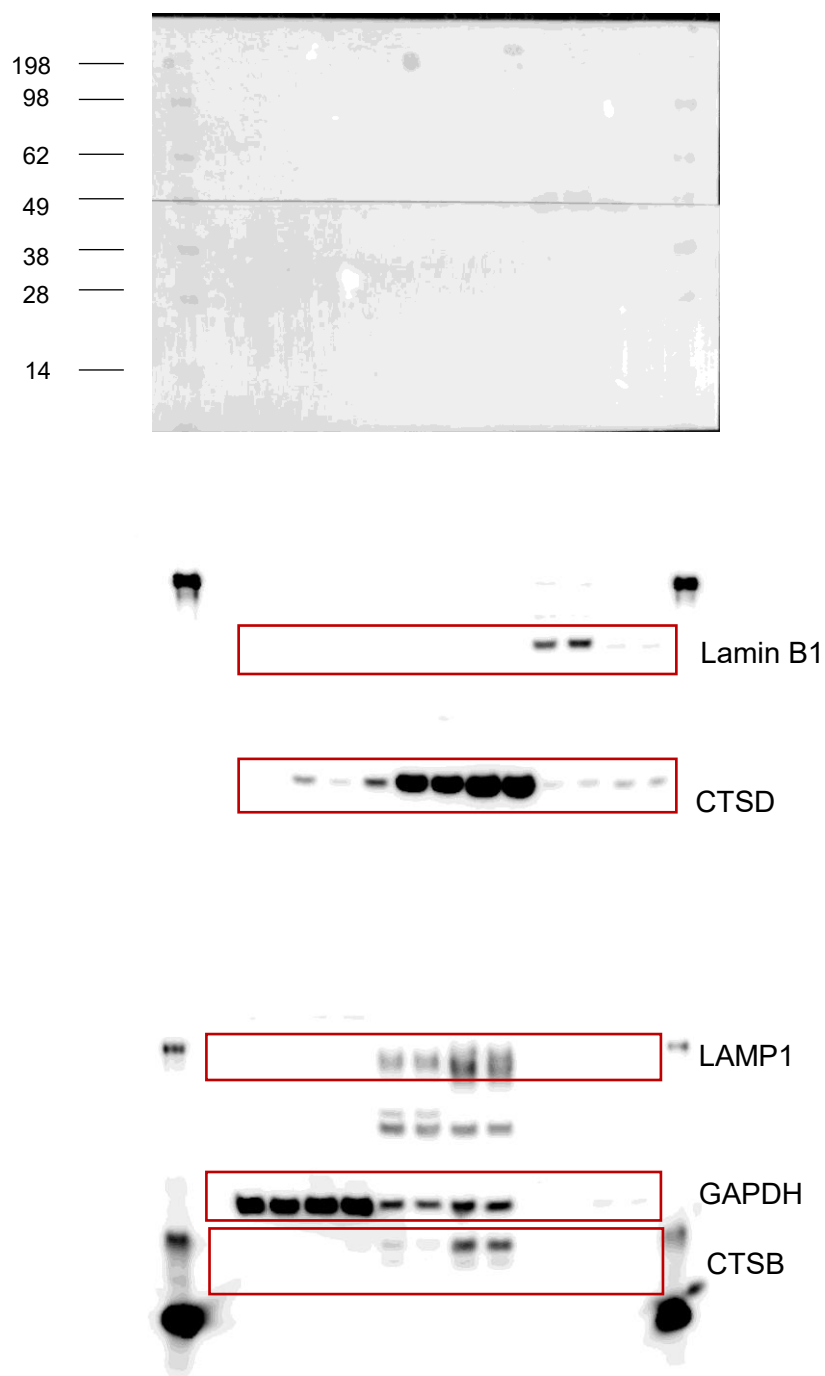

**Figure.S10** Full-length Western blot images corresponding to Supple Figure 3 in the manuscript.
