# Supplementary figures and images for: Novel Senolytic Ingredient, Camellia sinensis Root Extract, Ameliorates Skin Aging-Associated Phenotypes
Source: Research Square preprint supplement (doi:10.21203/rs.3.rs-7016169/v1), 2025-07-22

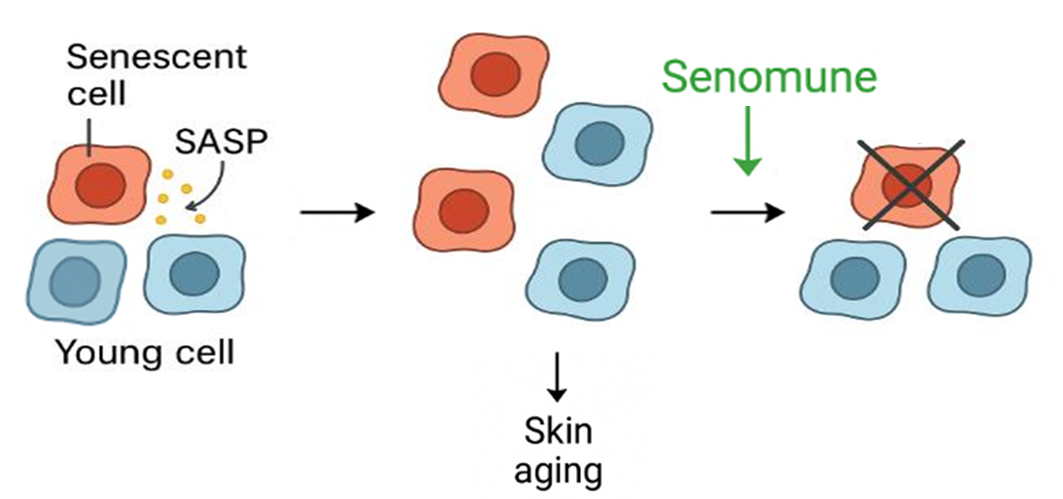

Supplement: Supplementary file 1 [file 9f8504fa1f81b3786b60fa9a.docx]
